# Supplementary material
Source: publisher figshare collection journal article supplement (https://tandf.figshare.com/ndownloader/files/18107465)
Supplement: Supplementary file 1 [file 18107465]

## Sheet: S-Table 1
Supplementary table 1. Baseline characteristics of patients with and without long-term follow-up.
	With follow-up at 4 years		Without follow-up
		n (%)		n (%)
	n missing	116 (100)	n missing	189 (100)	p-values
Age [Median(IQR)]	0	50.8 (25.9 - 62.8)	0	48.2 (27.0 - 68.6)	0.309
Age (in 2 groups)					0.082
≤65 years		91 (78.4)		131 (69.3)
>65 years		25 (21.6)		58 (30.7)
Female	0	30 (25.9)		50 (26.5)	0.909
Pupil reactivity in ED (in 2 groups)	3		6		0.994
Normal		100 (88.5)		162 (88.5)
Abnormal		13 (11.5)		21 (11.5)
Severity of TBI	0		0		0.84
HAIS 4		68 (58.6)		113 (59.8)
HAIS 5		48 (41.4)		76 (40.2)
Glasgow Coma Scale (GCS) in ED [Median(IQR)]	0	13 (3 - 15)	4	10 (3 - 14)	0.253
GCS	0		4		0.073
Mild (13-15)		59 (50.9)		78 (42.2)
Moderate (9-12)		8 (6.9)		28 (15.1)
Severe (3-8)		49 (42.2)		79 (42.7)
Injury Severity Score (ISS) [Median (IQR)]	0	25 (20 - 29)	0	25 (20 - 30)	0.372
ISS < 25		48 (41.4)		73 (38.6)	0.633
ISS ≥ 25		68 (58.6)		116 (61.4)
Multiple trauma	0	27 (23.3)	0	60 (31.8)	0.112
Mechanism accident	0		0		0.092
Falls		53 (45.7)		78 (41.3)
Road traffic accidents		43 (37.1)		91 (48.1)
Other mechanisms		20 (17.2)		20 (10.6)
Education	31		75		0.484
Apprendiceship/College of higher eduction/University		67 (78.8)		85 (74.6)
Mandatory school		18 (20.2)		29 (26.4)
Family situation	8		22		<0.0001
Single		16 (14.8)		62 (38.1)
Couple		57 (52.8)		82 (49.1)
Other		35 (32.4)		23 (13.8)
Working situation	6		12		0.124
Employees		78 (70.9)		109 (61.6)
Others		11 (10.0)		15 (8.5)
Retired persons		21 (19.1)		53 (29.9)
Suspicion of alcohol and/or psychiatric disorder	1	32 (27.8)	4	62 (33.5)	0.302
ED - Emergency department; HAIS - Abreviated injury score of the head region.
